# Supplementary material for: Highly selective C2H2 and CO2 capture and magnetic properties of a robust Co-chain based metal–organic framework
Source: Royal Society of Chemistry journal article supplement (doi:10.1039/c9dt00510b), 2019-01-01
Supplement: c9dt00510b1.pdf [file c9dt00510b1.pdf]

*Electronic Supporting Information*

## **Highly selective C<sub>2</sub>H<sub>2</sub> and CO<sub>2</sub> capture and magnetic properties of robust Co-chain based metal–organic framework**

Tao Ding<sup>a,b</sup>, Sheng Zhang<sup>c</sup>, Weiqiang Zhang<sup>a</sup>, Guofang Zhang<sup>a</sup>, Zi-Wei Gao<sup>\*a</sup>

*<sup>a</sup>Key Laboratory of Applied Surface and Colloid Chemistry, Ministry of Education, School of Chemistry & Chemical Engineering, Shaanxi Normal University, Xi'an 710062, P. R China. E-mail: zwgao@snnu.edu.cn*

*<sup>b</sup>College of Environment and Chemistry Engineering, Xi'an Polytechnic University, Xi'an 710048, P. R China.*

*<sup>c</sup>College of Chemistry and Chemical Engineering, Baoji University of Arts and Sciences, Baoji 721013, P. R China.*

### Scheme S1 The scheme for the synthesis of H<sub>4</sub>L.

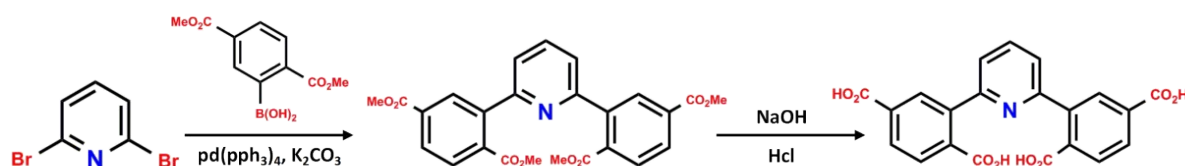

#### (1) 2,6-di(2',5'-dicarboxylphenyl)pyridine (H<sub>4</sub>L)

2,6-dibromopyridine (2.37 g, 10.00 mmol), (2,5-bis(methoxycarbonyl)phenyl)boronic acid (5.24 g, 22.00 mmol), Pd(PPh<sub>3</sub>)<sub>4</sub> (0.58 g, 0.50 mmol) and K<sub>2</sub>CO<sub>3</sub> (6.64 g, 48.00 mmol) were mixed in a 250 mL Schlenk flask. After vacuumized and refilled with N<sub>2</sub> for three times, toluene-ethanol-water (60 ml, 30 ml, 30 ml) was added. The mixture was stirred at 75°C for 18h and then cooled to room temperature. After removing the organic phase under vacuum, dichloromethane (150 mL) and H<sub>2</sub>O (75 mL) were added. The organic phase was separated and then the aqueous phase was extracted three times with dichloromethane (100×3 mL). The combined organic phases were washed with saturated brine, dried over anhydrous MgSO<sub>4</sub>. After removing the organic solvent by rotary evaporation, the residue was purified by column chromatography with dichloromethane/ethyl acetate (3/1, v/v) as eluent to obtain white solid product (3.84 g, 83.0% yield). 3.84 g (8.30 mmol) of dimethyl tetramethyl 2,2'-(pyridine-2,6-diyl)diterephthal ate was dissolved in THF (100 mL), and then 160 mL 2 M NaOH aqueous solution was added. The solut was stirred at 60°C for 6h and the THF was removed in vacuum. Concentrated hydrochloric acid was added to the remaining aqueous solution until the solution became acidic (pH = 2~3). The solid was collected by filtration, washed several times with distilled water, and dried under vacuum to give white solid product (3.09 g, 91% yield). <sup>1</sup>H and <sup>13</sup>C NMR spectra were recorded on 500 MHz spectrometer. <sup>1</sup>H NMR chemical shifts were determined relative to internal (CH<sub>3</sub>)<sub>4</sub>Si (TMS) at δ 0.00 or to the signal of the residual protonated solvent: (CD<sub>3</sub>)<sub>2</sub>SO δ 2.50. <sup>13</sup>C NMR chemical shifts were determined relative to internal TMS at δ 0.0.

<sup>1</sup>H NMR (500 MHz, CDCl<sub>3</sub>) δ 13.21 (s, 4H), 8.17 (d, *J* = 1.5 Hz, 2H), 8.06 (dd, *J* = 1.5,

8.0 Hz, 2H), 7.96 (t,  $J = 8.0$  Hz, 1H), 7.83 (d,  $J = 8.0$  Hz, 2H), 7.61 (d,  $J = 8.0$  Hz, 2H);

$^{13}\text{C}$  NMR (125 MHz,  $\text{CDCl}_3$ )  $\delta$  169.4, 166.9, 157.0, 140.4, 137.6, 137.2, 133.2, 131.1, 129.8, 129.5, 122.3.

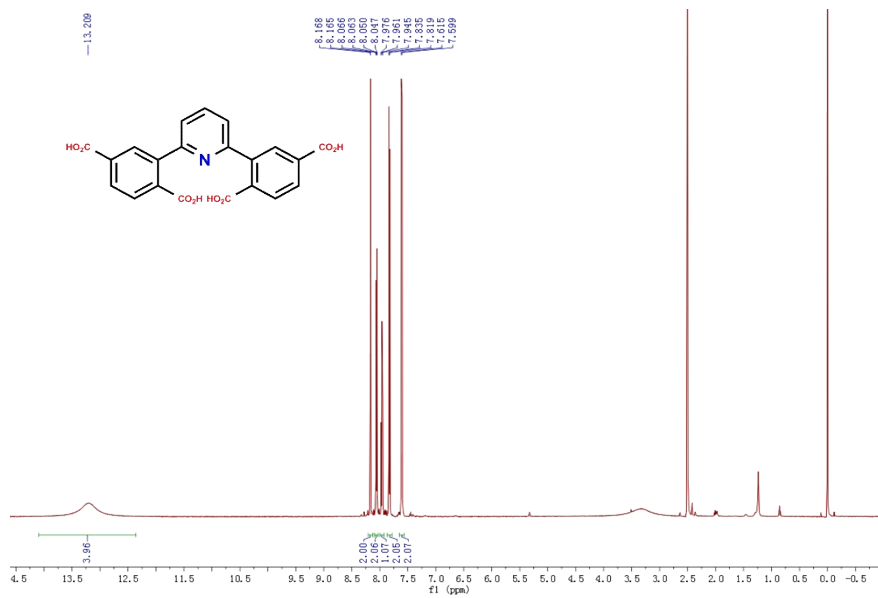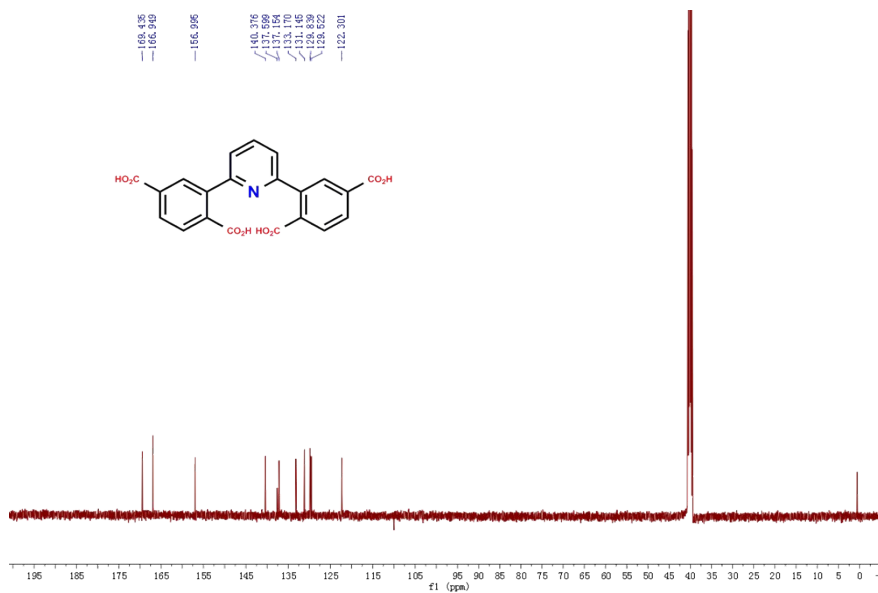

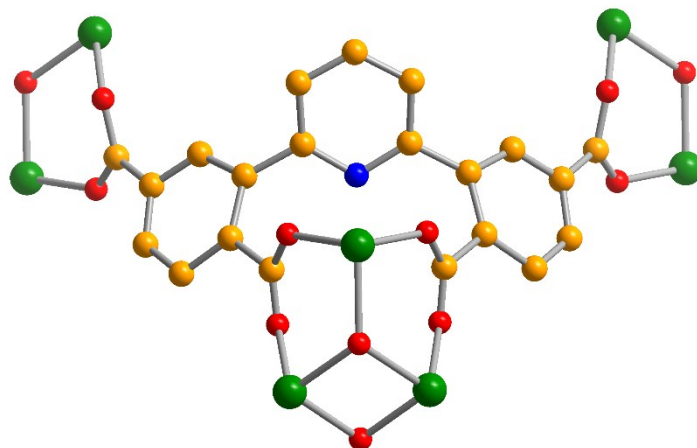

**Fig. S1** The bridging mode of L<sup>4</sup> in **1**.

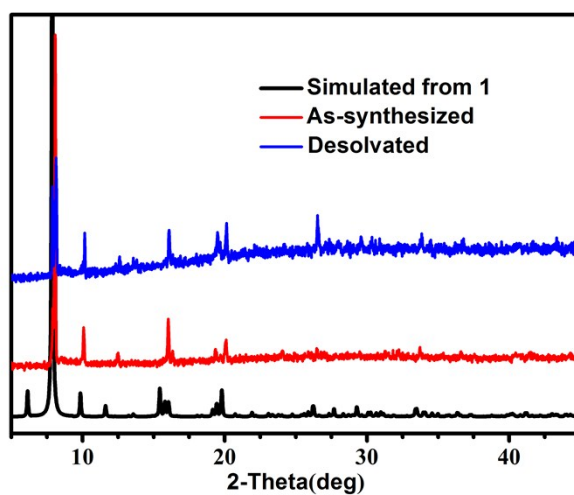

**Fig. S2** PXRD patterns for **1**: simulated, as-synthesized, and desolvated samples.

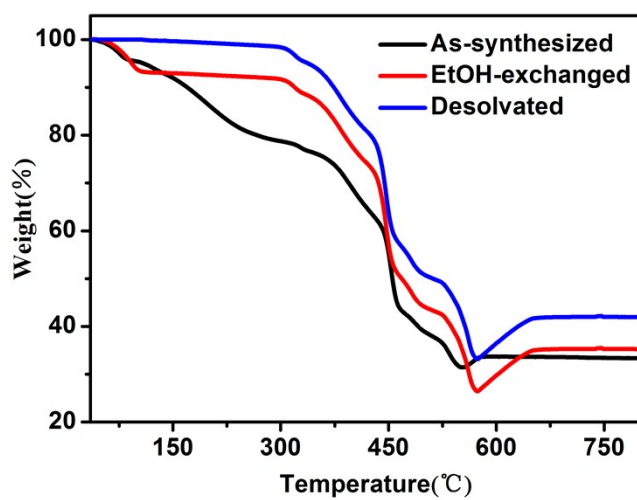

**Fig. S3** TGA for **1**: as-synthesized, EtOH-exchanged, and desolvated samples.

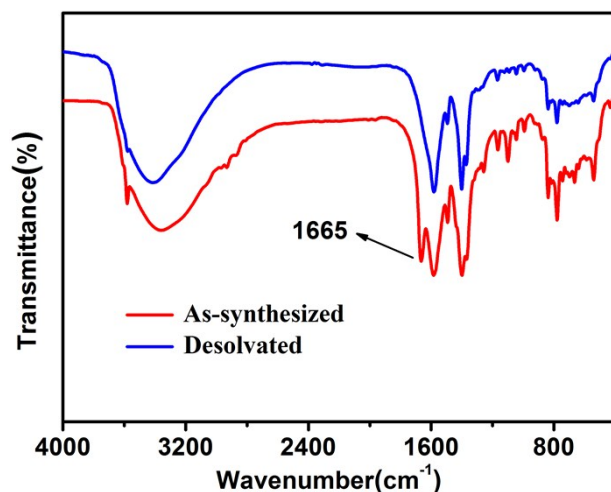

Fig. S4 IR for 1: as-synthesized and desolvated samples.

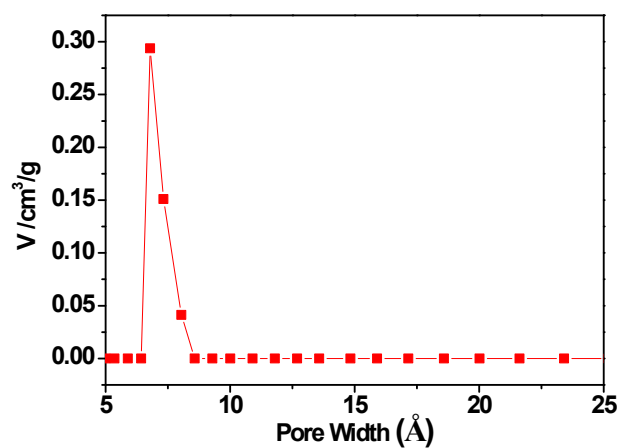

Fig. S5 The pore size distribution incremental pore volume vs. pore width

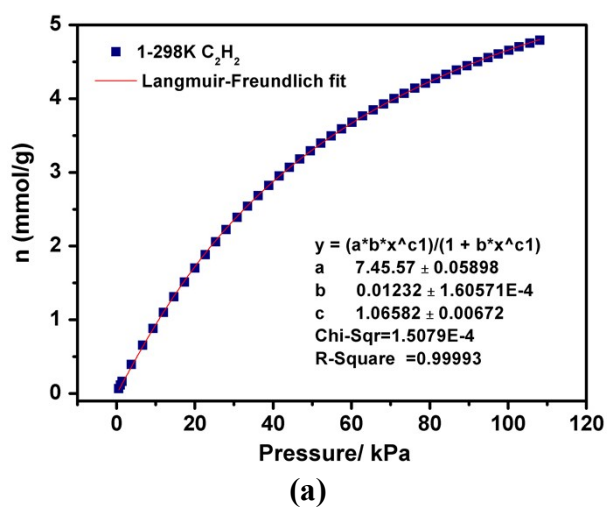

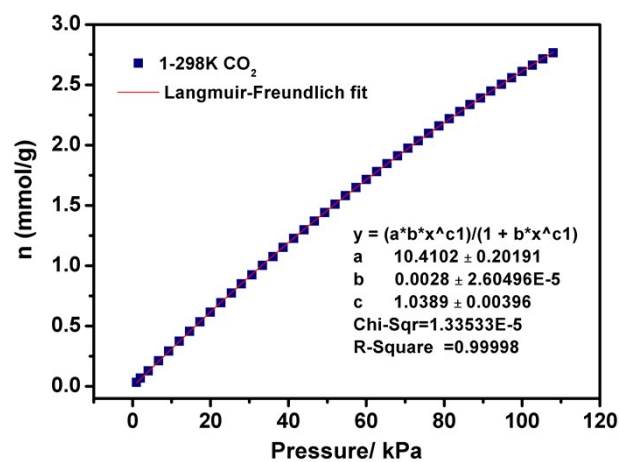

(b)

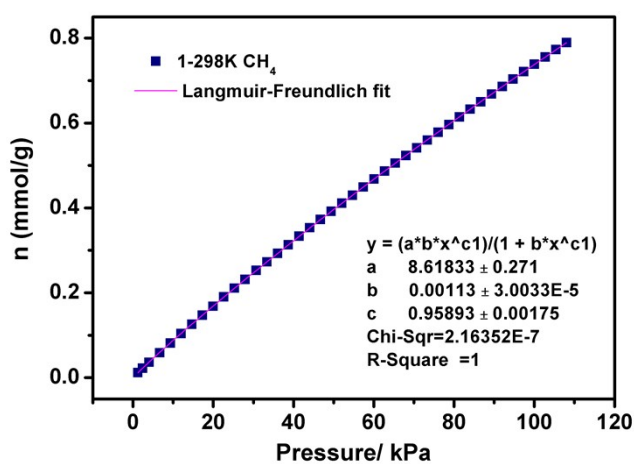

(c)

**Fig. S6** C<sub>2</sub>H<sub>2</sub> (a), CO<sub>2</sub> (b), and CH<sub>4</sub> (c) adsorption isotherms of **1a** with fitting by L-F model.

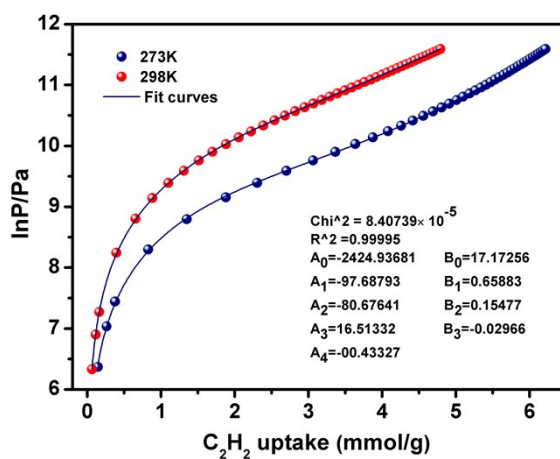

(a)

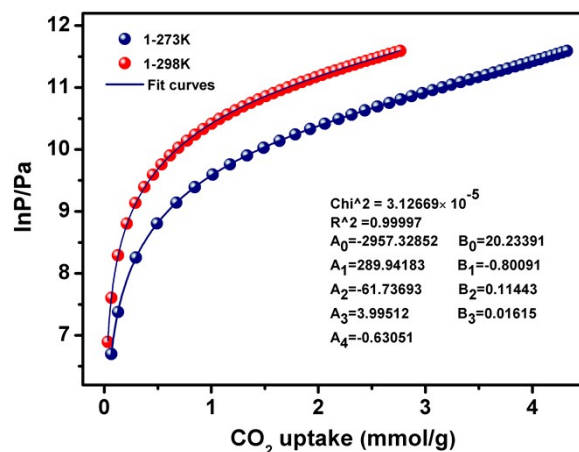

(b)

Fig. S7 C<sub>2</sub>H<sub>2</sub> (a) and CO<sub>2</sub> (b) adsorption isotherms for **1a** with fitting by Virial 2 model.

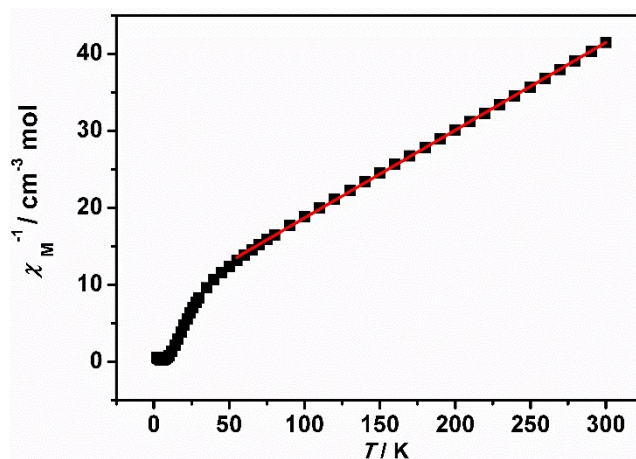

Fig. S8  $\chi_M^{-1}$  versus  $T$  plots fit by the Curie–Weiss law.

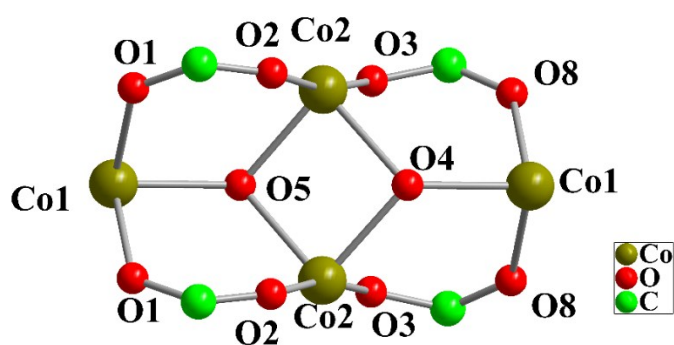

Fig. S9 Coordination polyhedra of Co1 and Co2 cations, and details of tetrameric cluster.

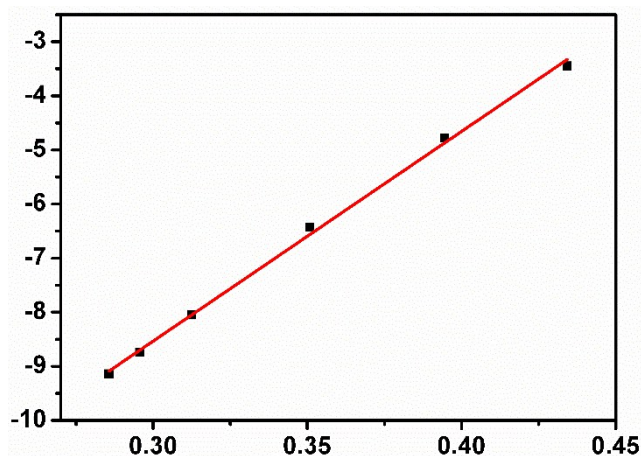

**Fig. S10** Linear fit by Arrhenius law for **1**.

**Table. S1** Selected bond lengths (Å) and bond angles (deg) for **1**.

---

|                     |           |
|---------------------|-----------|
| Co(1)-O(1)          | 2.168(6)  |
| Co(1)-O(4)#2        | 2.069(8)  |
| Co(1)-O(5)#3        | 2.147(8)  |
| Co(1)-O(8)#2        | 2.124(6)  |
| Co(2)-O(2)#5        | 2.100(7)  |
| Co(2)-O(3)          | 2.079(7)  |
| Co(2)-O(4)          | 2.108(5)  |
| Co(2)-O(5)          | 2.095(6)  |
| Co(2)-O(6)          | 2.201(8)  |
| Co(2)-O(7)          | 2.164(8)  |
| <br>                |           |
| O(1)#1-Co(1)-O(1)   | 89.1(3)   |
| O(4)#2-Co(1)-O(1)   | 84.8(2)   |
| O(4)#2-Co(1)-O(5)#3 | 179.3(4)  |
| O(4)#2-Co(1)-O(8)#4 | 95.4(2)   |
| O(5)#3-Co(1)-O(1)   | 95.6(3)   |
| O(8)#2-Co(1)-O(1)   | 179.7(4)  |
| O(8)#4-Co(1)-O(1)   | 90.73(18) |
| O(8)#4-Co(1)-O(1)#1 | 179.7(4)  |
| O(8)#4-Co(1)-O(5)#3 | 84.1(3)   |
| O(8)#4-Co(1)-O(8)#2 | 89.4(4)   |
| O(2)#5-Co(2)-O(4)   | 96.0(3)   |
| O(2)#5-Co(2)-O(6)   | 89.6(4)   |



|                   |           |
|-------------------|-----------|
| O(2)#5-Co(2)-O(7) | 84.4(4)   |
| O(3)-Co(2)-O(2)#5 | 169.0(2)  |
| O(3)-Co(2)-O(4)   | 92.6(3)   |
| O(3)-Co(2)-O(5)   | 92.5(3)   |
| O(3)-Co(2)-O(6)   | 82.0(3)   |
| O(3)-Co(2)-O(7)   | 88.6(3)   |
| O(4)-Co(2)-O(6)   | 174.2(3)  |
| O(4)-Co(2)-O(7)   | 91.0(3)   |
| O(5)-Co(2)-O(2)#5 | 94.8(3)   |
| O(5)-Co(2)-O(4)   | 86.91(16) |
| O(5)-Co(2)-O(6)   | 91.1(3)   |
| O(5)-Co(2)-O(7)   | 177.7(3)  |
| O(7)-Co(2)-O(6)   | 91.0(2)   |

---

Symmetry transformations used to generate equivalent atoms:

#1  $x, -y+1, z$     #2  $x-1/2, y+1/2, z$     #3  $x-1/2, y+1/2, z-1$   
#4  $x-1/2, -y+1/2, z$     #5  $x+1/2, -y+1/2, z+1$
